# Supplementary material
Source: Research Square preprint supplement (doi:10.21203/rs.3.rs-9370294/v1)
Supplement: Supplementary file 1 [file 2c713953616cf5bd36023a71.docx]

| Variable | Total (N = 44) | Severe ED (IIEF-5 <7)  (N=24) | Non-severe ED (IIEF-5 ≥7) (N =20) | p value |
| --- | --- | --- | --- | --- |
| Age (years) | 65.1 (7.1) | 67.3 (5.6) | 62.6 (8) | **0.049** |
| Active smoker, n (%) | 33 (75) | 19 (79.2) | 14 (70) | 0.484 |
| Pack-years | 56.0 (31.7) | 62.3 (34.3) | 49.8 (28.7) | 0.489 |
| BMI (Kg/m2) | 29.2 (5.9) | 29.1 (5.9) | 29.4 (6.1) | 0.916 |
| Waist circumference (cm) | 103.7 (16.5) | 104.1 (11.6) | 103.4 (21.1) | 0.835 |
| Charlson index | 1.8 (1.21) | 2.3 (1.43) | 1.3 (0.59) | **0.012** |
| Hypertension, n (%) | 29 (65) | 17 (70.8) | 12 (60) | 0.450 |
| Dyslipidaemia, n (%) | 20 (45) | 13 (54.2) | 7 (35) | 0.204 |
| Metabolic syndrome, n (%) (N= 34)  -TG > 150mg/dl or treatment  -BP ≥ 130/80mmHg or treatment  -Central obesity  -cHDL < 40 mg/dL  -Elevated fasting glucose | 15 (44.1)  12(35.3)  23 (67.6)  23 (67.6)  5 (14.7)  18 (52.9) | 9 (47.4)  8 (42.1)  10 (52.6)  14 (70)  3 (15.8)  10 (52.6) | 6 (40)  4 (26.7)  13 (86.7)  9 (60)  2 (13.3)  8 (53.3) | 0.667  0.350  0.064  0.537  >0.999  0.968 |
| Depression, n (%) | 4 (9.1) | 2 (8.3) | 2 (10) | >0.999 |
| OSA, n (%) | 17 (15.9) | 16 (25) | 1 (5) | 0.106 |
| Dyspnoea, (mMRC) | 1.59 (0.9) | 1.25 (0.6) | 1.88 (1.0) | **0.004** |
| FVC (ml) | 3042 (1331) | 2954 (1684) | 3139 (819) | 0.174 |
| FVC (%) | 72.4 (20.1) | 68.2 (22.1) | 76.9 (17.1) | 0.197 |
| FEV1 (ml) | 1585 (620) | 1470 (495) | 1712 (725) | 0.378 |
| FEV1 % | 50.4 (19.1) | 48.8 (17.8) | 52.2 (20.9) | 0.479 |
| FEV1/FVC % | 53 (14.5) | 54.1  (9.8) | 51.8 (18.8) | 0.600 |
| WT Distance (meters) | 432 (87.3) | 414.2 (97.3) | 450.8 (73.7) | 0.151 |
| Hemoglobine (g/dL) | 15.2 (1.4) | 14.9 (1.2) | 15.7 (1.5) | 0.114 |
| Glucose (mg/dL) | 107.1 (21.6) | 106.3 (19.4) | 108.1 (24.5) | 0.832 |
| Glycated hemoglobin (%) | 5.86 (0.4) | 6.01 (0.5) | 5.7 (0.3) | **0.017** |
| Total cholesterol (mg/dL) | 172.2 (46.3) | 157.4 (47.9) | 190.1 (38.3) | **0.006** |
| cHDL (mg/dL) | 50.2 (13.6) | 47.7 (13.6) | 53.2 (13.2) | 0.150 |
| cLDL (mg/dL) | 104.5 (41.7) | 97.8 (47.6) | 112.2 (33.2) | 0.103 |
| Triglycerides(mg/dL) | 132.3 (57.1) | 139.0 (53.1) | 125.4 (61.6) | 0.382 |
| Total exacerbations previous year | 1.66 (2.1) | 2.04 (2.5) | 1.2 (1.4) | 0.251 |
| COPD treatment  -ICS, n (%)  -LABA, n (%)  -LAMA, n (%) | 26 (59.1)  39 (88.6)  43 (97.7) | 17 (70.8)  23 (95.8)  23 (95.8) | 9 (45)  16 (80)  20 (100) | 0.083  0.160  > 0.999 |
| Other treatment, n (%)  -OAD  -Antihypertensive  -Lipid lowering agents  -Diuretic | 6 (14.6)  20 (46.5)  16 (38.1)  7 (17.5) | 5 (23.8)  13 (56.5)  11 (50)  2 (10) | 1 (5)  7 (35)  5 (25)  5 (25) | 0.184  0.158  0.096  0.407 |
| BODEx score (N=26) | 2.85 (2.05) | 3.94 (1.69) | 1.1 (1.2) | **0.001** |
| CAT score | 16.5 (10.6) | 22.2 (9.2) | 9.6 (7.7) | **< 0.001** |
| HADS  HADS depression  HADS anxiety | 11.5 (7.6)  5.43 (3.7)  6.09 (4.4) | 13.3 (6.9)  6.65 (3.7)  6.65 (3.9) | 9.13 (8.1)  3.8 (3.3)  5.333 (5.1) | 0.054  **0.021**  0.192 |
| EQ-5D Utility | 8.32 (2.5) | 9.43 (2.3) | 7.21 (2.1) | **0.015** |
| EQ-5D VAS | 60 (24.6) | 54.6 (24.4) | 67.1 (23.9) | 0.076 |

**Table 1.** Clinical characteristics and questionnaires in all patients and according to the ED severity.

Footnote: Data are presented as mean (SD) unless otherwise specified. Abbreviations: BMI: Body Mass Index;BODEx: Body mass index, airflow Obstruction, Dyspnea and Exacerbation; BP: Blood pressure; CAT: COPD Assessment Test; cHDL: high-density lipoprotein cholesterol; cLDL: low-density lipoprotein cholesterol; ED:Erectile dysfunction; EQ-5D: EuroQol-5; FEV1: Forced expiratory volume in the first second; FVC: Forced Vital Capacity; HADS: Hospital Anxiety and Depression Scale; ICS: inhaled corticosteroids; LAMA: long-acting antimuscarinic agents; LABA: long-acting beta-2 agonists; mMRC: Modified Medical Research Council; OAD: Oral antidiabetics; OSA: Obstructive sleep apnea; SpO2: Oxygen saturation; TG: Triglyceride; WT: Walking test.

| Variable | Total (N = 44) | Severe ED (IIEF-5 <7)  (N=24) | Non-severe ED (IIEF-5 ≥7) (N =20) | p value |
| --- | --- | --- | --- | --- |
| PSA (ng/ml) | 1.9 (2.2) | 2.1 (2.5) | 1.7 (1.9) | 0.450 |
| Total testosterone (ng/dl) | 208.3 (181.9) | 203.6 (170.9) | 214 (198.7) | 0.981 |
| Biochemical TDS (<250ng/dl total serum testosterone), n (%) | 31 (70.5) | 17 (70.8) | 14 (70) | 0.952 |
| SHBG (mg/dL) | 42.1 (24.9) | 46.1 (29.6) | 37.5 (17.8) | 0.770 |
| LH (mlU/mL) | 5.8 (6.2) | 7.8 (7.8) | 3.7 (2.8) | **0.001** |
| FSH (UI/L) | 11.4 (12.6) | 14.8 (15.7) | 7.6 (6.5) | **0.008** |
| IIEF-5 score. Domains:  -Erectile function  -Orgasmic function  -Sexual desire  -Intercourse satisfaction  -Overall satisfaction | 31.3 (23.7)  9.6 (8.9)  4.9 (4.5)  5.3 (2.6)  4.9 (5.1)  4.7 (2.8) | 13.2 (8.5)  2.7 (2.1)  1.8 (3)  4.2 (2.7)  1.3 (2)  2.7 (1.2) | 53.1 (16.4)  17.8 (6.5)  8.7 (2.4)  6.6 (1.9)  9.3 (4.2)  7.1 (2.2) | **< 0.001** |
| IPSS (N = 38) | 8.4 (7.4) | 11.3 (8.2) | 4.8 (4.4) | **0.001** |
| Degree IPSS, n (%)  -Mild  -Moderate  -Severe | 18 (47)  16 (42)  4 (10.5) | 5 (23.8)  12 (57)  4 (19) | 13 (76.5)  4 (23.5)  0 (0) | **0.003** |
| AMSS  (N=33) | 38.8 (13.3) | 42.8 (11.3) | 33.5 (14.3) | **0.031** |
| AMSS score degree, n (%)  -asymptomatic  - mild  -moderate  -severe | 8 (24.2)  7 (21.2)  10(30.3)  8 (24.2) | 1 (5.3)  6 (31.6)  7 (36.8)  5 (26.3) | 7 (50)  1 (7.1)  3 (21.4)  3 (21.4) | **0.025** |

**Table 2.** Andrological and urological characteristics in all patients and according to the ED severity.

Footnote: Data are presented as mean (SD) unless otherwise specified. Abbreviations: AMSS: Aging Males' Symptoms Scale; ED:Erectile dysfunction; FSH: Follicle stimulating hormone; IIEF-5: International Index of Erectile Function; IPSS: International Prostate Symptom Score; LH: Luteinizing hormone; PSA: Prostate-specific antigen; SHBG: sex hormone binding globulin; TDS: Testosterone deficiency syndrome

**Degree AMSS**

|  | **Total (N=33)** | **Asymptomatic**  **N= 8 (24.2%)** | **Mild/ moderate / severe**  **n=15 (75.8%)** |
| --- | --- | --- | --- |
| **TDS_No** | 12 (36.4%) | 2 (25%) | 10 (83.3%) |
| **TDS_Yes** | 21 (63.6%) | 6 (75%) | 15 (71.4%) |

**Kappa=-0.128 (p=0.443)**

**Table 3.** Relationship between biochemical testosterone deficiency and AMSS symptom degree.

Footnote: Abbreviations: AMSS: Aging Males' Symptoms Scale; TDS: Testosterone Deficiency Syndrome.

| **Variable** | IIEF-5 score; r | Erectile function  (IIEF-5); r | Orgasmic function  (IIEF-5); r | Sexual desire (IIEF-5); r | Intercourse satisfaction (IIEF-5); r | Overall satisfaction (IIEF-5); r | AMS score; r | IPSS score; r | Total testosterone; r |
| --- | --- | --- | --- | --- | --- | --- | --- | --- | --- |
| FVC (%) | 0.231 | 0.231 | 0.142 | 0.345 | 0.176 | 0.122 | -0.079 | -0.174 | 0.039 |
| FEV1 (%) | 0.124 | 0.148 | 0.029 | 0.147 | 0.183 | 0.069 | -0.025 | -0.044 | 0.027 |
| FEV1/FVC | -0.102 | -0.042 | -0.096 | -0.221 | 0.004 | -0.122 | 0.200 | 0.058 | 0.027 |
| CAT score | **-0.664** | **-0.670** | **-0.609** | **-0.457** | **-0.628** | **-0.633** | **0.472** | **0.469** | **0.326** |
| mMRC | **-0.461** | **-0.464** | **-0.461** | -0.280 | **-0.433** | **-0.412** | **0.351** | **0.251** | 0.134 |
| BODEx score | **-0.649** | **-0.604** | **-0.567** | **-0.571** | **-0.614** | **-0.538** | 0.039 | 0.338 | **-0.408** |
| EQ-5 UTILITY score | **-0.365** | **-0.407** | -0.275 | -0.171 | **-0.385** | **-0.393** | **0.525** | **0.424** | 0.260 |
| EQ-5 VAS score | 0.264 | 0.267 | 0.224 | 0.158 | 0.311 | **0.336** | **-0.440** | **-0.462** | -0.243 |
| HADS score | **-0.492** | **-0.437** | **-0.491** | **-0.357** | **-0.433** | **-0.478** | **0.857** | **0.485** | 0.184 |
| WT distance (m) | 0.296 | 0.267 | 0.262 | 0.250 | 0.127 | 0.223 | 0.066 | **-0.432** | -0.082 |
| CCI score | **-0.347** | -0.415 | -0.306 | -0.004 | -0.337 | -0.413 | 0.127 | 0.252 | 0.171 |

**Table 4.** Correlations analysis

Footnote: Data are presented as mean (SD) unless otherwise specified.

In green: p < 0.001 ; in yellow: p > 0.001 – < 0.05 ; in red: p > 0.05.

Abbreviations: BODEx: Body mass index, airflow Obstruction, Dyspnoea and Exacerbation; CAT: COPD Assessment Test; CCI: Charlson Comorbidity Index; EQ-5: EuroQol-5; FEV1: Forced expiratory volume in the first second; FSH: Follicle stimulating hormone; FVC: Forced Vital Capacity; HADS: Hospital Anxiety and Depression Scale; mMRC: Modified Medical Research Council; WT: Walking test.

**Table 5.** Independent predictors of severe ED determined by multivariable logistic regression analysis

Model 1.

|  | Univariable | | | Multivariableab | | |
| --- | --- | --- | --- | --- | --- | --- |
| Variablee | OR | 95% CI | P-value | OR | 95% CI | P-value |
| Age (+1 year)fg | 1.08 | 0.99 1.18 | 0.092 |  |  |  |
| FEV1 (+1 %)f | 0.99 | 0.96 to 1.02 | 0.553 |  |  |  |
| Smoker | 1.63 | 0.41 to 6.43 | 0.486 |  |  |  |
| Charlson Comorbidity Index (CCI) Score corrected (+1)f | 1.67 | 1.11 to 2.52 | 0.013 | 1.67 | 0.98 to 2.85 | 0.061 |
| mMRC (+1)fg | 2.35 | 1.07 to 5.15 | 0.032 |  |  |  |
| CAT TOTAL score (+1)f | 1.16 | 1.06 to 1.28 | 0.002 | 1.17 | 1.04 to 1.30 | 0.006 |
| BODEx score (+1)f | 1.39 | 1.01 to 1.93 | 0.045 |  |  |  |
| Metabolic syndrome | 1.50 | 0.45 to 4.98 | 0.508 |  |  |  |
| Total testosterone (+1 ng/dL)f | 1.00 | 1.00 to 1.00 | 0.848 |  |  |  |
| AMSS score (+1)fg | 1.04 | 1.00 to 1.09 | 0.064 |  |  |  |
| IPSS score (+1)f | 1.12 | 1.01 to 1.24 | 0.040 |  |  |  |
| HADS Total score (+1)f | 1.09 | 1.00 to 1.19 | 0.050 | 1.13 | 1.00 to 1.27 | 0.042 |

Footnote: Abbreviations: OR, odds ratio; CI, confidence interval; AMSS: Aging Males' Symptoms Scale; BODEx: Body mass index, airflow Obstruction, Dyspnoea and Exacerbation; CAT: COPD Assessment Test; CCI: Charlson comorbidity Index; HADS: Hospital Anxiety and Depression Scale; IPSS: International Prostate Symptom Score; mMRC: Modified Medical Research Council.

Data are shown as estimated ORs (95% CIs) of the explanatory variables in the erectile dysfunction group. The OR represents the odds that the presence of erectile dysfunction will occur given exposure of the explanatory variable, compared to the odds of the outcome occurring in the absence of that exposure. The P-values are based on the null hypothesis that all ORs relating to an explanatory variable equal unity (no effect). Factors showing an association in the univariable analyses (p<0.25) were incorporated into the multivariable regression model. Final variable selection was performed using the backward stepwise selection method (likelihood ratio) (Pin<0.05, Pout>0.10). a Hosmer–Lemeshow goodness-of-fit test, P = 0.563. b Area under the ROC curve, AUC = 0.87 (95% CI 0.77 to 0.97 f +1 indicates increase in 1 unit. g Variable excluded from the multivariable model due to high correlation (Age with Charlson comorbidity index score; mMRC dyspnea scale with CAT score and BODEx score; AMS score with HADS score).

Probability of severe erectile dysfunction

| **Predictors** | **Probability** |
| --- | --- |
| None | 4.8% |
| HADS Score >15 | 11.5% |
| Charlson Comorbidity Index Score >3 | 19.4% |
| HADS Score >15 + Charlson Comorbidity Index Score >3 | 38.3% |
| CAT Score >10 | 45.5% |
| HADS Score >15 + CAT Score >10 | 68.4% |
| Charlson Comorbidity Index Score >3 + CAT Score >10 | 80.1% |
| Charlson Comorbidity Index Score >3 + CAT Score >10 + HADS Score >15 | 91.2% |

Footnote: Predictors from the model were used to calculate the probability of severe erectile dysfunction by the following formula. Exp (β) / (1+Exp(β)), where β = -2.997 + 1.569 (if Charlson Comorbidity Index Score >3) + 2.817 (if CAT Score >10) + 0.952 (if HADS Score >15). Using this model, the probability of erectile dysfunction without any of these risk factors was 5%, being 91% for patients showing the three risk factors.

b ) Model 2.

|  | Univariable | | | Multivariableab | | |
| --- | --- | --- | --- | --- | --- | --- |
| Variablee | OR | 95% CI | P-value | OR | 95% CI | P-value |
| Age (+1 year)fg | 1.08 | 0.99 1.18 | 0.092 |  |  |  |
| FEV1 (+1 %)f | 0.99 | 0.96 to 1.02 | 0.553 |  |  |  |
| Smoker | 1.63 | 0.41 to 6.43 | 0.486 |  |  |  |
| Charlson Comorbidity Index (CCI) Score corrected (+1)f | 1.67 | 1.11 to 2.52 | 0.013 | 1.67 | 1.01 to 2.85 | 0.041 |
| Previous exacerbation | 1.99 | 0.57 to 6.90 | 0.280 |  |  |  |
| mMRC (+1)fg | 2.35 | 1.07 to 5.15 | 0.032 |  |  |  |
| CAT TOTAL score (+1)f | 1.16 | 1.06 to 1.28 | 0.002 | 1.17 | 1.04 to 1.30 | 0.006 |
| BODEx score (+1)f | 1.39 | 1.01 to 1.93 | 0.045 |  |  |  |
| Metabolic syndrome metabólico | 1.50 | 0.45 to 4.98 | 0.508 |  |  |  |
| HADS Total score (+1)f | 1.09 | 1.00 to 1.19 | 0.050 | 1.13 | 1.00 to 1.27 | 0.042 |
|  |  |  |  |  |  |  |

Footnote: Abbreviations: OR, odds ratio; CI, confidence interval; AMSS: Aging Males' Symptoms Scale; BODEx: Body mass index, airflow Obstruction, Dyspnoea and Exacerbation; CAT: COPD Assessment Test; CCI: Charlson comorbidity Index; HADS: Hospital Anxiety and Depression Scale; IPSS: International Prostate Symptom Score; mMRC: Modified Medical Research Council.

Data are shown as estimated ORs (95% CIs) of the explanatory variables in the erectile dysfunction group. The OR represents the odds that the presence of erectile dysfunction will occur given exposure of the explanatory variable, compared to the odds of the outcome occurring in the absence of that exposure. The P-values are based on the null hypothesis that all ORs relating to an explanatory variable equal unity (no effect). Factors showing an association in the univariable analyses (p<0.25) were incorporated into the multivariable regression model. Final variable selection was performed using the backward stepwise selection method (likelihood ratio) (Pin<0.05, Pout>0.10). a Hosmer–Lemeshow goodness-of-fit test, P = 0.563. b Area under the ROC curve, AUC = 0.87 (95% CI 0.77 to 0.97 g Variable excluded from the multivariable model due to high correlation (Age with Charlson comorbidity index score; mMRC dyspnea scale with CAT score and BODEx score).

Probability of severe erectile dysfunction

| **Predictors** | **Probability** |
| --- | --- |
| None | 4.8% |
| HADS Score >15 | 11.5% |
| Charlson Comorbidity Index Score >3 | 19.4% |
| HADS Score >15 + Charlson Comorbidity Index Score >3 | 38.3% |
| CAT Score >10 | 45.5% |
| HADS Score >15 + CAT Score >10 | 68.4% |
| Charlson Comorbidity Index Score >3 + CAT Score >10 | 80.1% |
| Charlson Comorbidity Index Score >3 + CAT Score >10 + HADS Score >15 | 91.2% |

Footnote: Predictors from the model were used to calculate the probability of severe erectile dysfunction by the following formula. Exp (β) / (1+Exp(β)), where β = -2.997 + 1.569 (if Charlson Comorbidity Index Score >3) + 2.817 (if CAT Score >10) + 0.952 (if HADS Score >15). Using this model, the probability of erectile dysfunction without any of these risk factors was 5%, being 91% for patients showing the three risk factors.
